# Supplementary material for: Identification of a conserved 5′-dRP lyase activity in bacterial DNA repair ligase D and its potential role in base excision repair
Source: PubMed Central journal article supplement (PMC4770248; doi:10.1093/nar/gkw054), 2016-01-29
Supplement: supp_gkw054_nar-02220-d-2015-File008.pdf [file supp_gkw054_nar-02220-d-2015-File008.pdf]

## Supplementary Information

# Identification of a Conserved 5'-dRP Lyase Activity in Bacterial DNA Repair Ligase D and Its Potential Role in Base Excision Repair

Ana de Ory<sup>1</sup>, Katja Nagler<sup>2</sup>, Begoña Carrasco<sup>3</sup>, Marina Raguse<sup>2</sup>, Olga Zafra<sup>1</sup>, Ralf Moeller<sup>2,\*</sup> and Miguel de Vega<sup>1,\*</sup>

<sup>1</sup>Centro de Biología Molecular "Severo Ochoa" (Consejo Superior de Investigaciones Científicas-Universidad Autónoma de Madrid), Nicolás Cabrera 1, 28049 Madrid, Spain.

<sup>2</sup>Radiation Biology Department, German Aerospace Center (DLR), Institute of Aerospace Medicine, Linder Hoehe, D-51147 Cologne, Germany.

<sup>3</sup>Centro Nacional de Biotecnología (Consejo Superior de Investigaciones Científicas), Darwin 3, 28049 Madrid, Spain.

\*To whom correspondence should be addressed. Tel: +34 911964717; Fax: +34 911964420; Email: mdevega@cbm.csic.es. Correspondence may also be addressed to Tel: +49 2203 601 3145; Fax: +49 2203 61790; E-mail: ralf.moeller@dlr.de

**Table S1.** Bacterial strains used in this study

| Strain  | Gene/mechanism | Genotype                                                                                | Source/reference             |
|---------|----------------|-----------------------------------------------------------------------------------------|------------------------------|
| 168     | wt             | <i>trpC2</i>                                                                            | Laboratory strain            |
| BFS184  | LigD [NHEJ]    | + <i>ykoU:erm<sup>a</sup></i>                                                           | (1)                          |
| GP1502  | Nfo [EndoIV]   | + <i>Δnfo:cat<sup>b</sup></i>                                                           | (2)                          |
| GP1502L | LigD Nfo       | + <i>ykoU:erm Δnfo:cat<sup>c</sup></i>                                                  | GP1502 DNA transform BFS1845 |
| BG214   | wt             | <i>trpCE metA5 amyE1 ytsJ1 rsbV37 xre1 xkdA1 att<sup>SPB</sup> att<sup>ICEBs1</sup></i> | Laboratory strain            |
| BC1000  | wt             | + <i>neo<sup>d</sup></i>                                                                | This work                    |
| BC1001  | LigDE184A      | + <i>ykoUE184A neo<sup>d</sup></i>                                                      | This work                    |
| BC1002  | Nfo            | + <i>Δnfo:cat<sup>b</sup> neo<sup>d</sup></i>                                           | This work                    |
| BC1003  | LigDE184A Nfo  | + <i>ykoUE184A neo<sup>d</sup> Δnfo:cat<sup>b</sup></i>                                 | This work                    |

<sup>a</sup>Resistance to erythromycin (Erm<sup>R</sup>, 2 μg/ml), <sup>b</sup>Resistant to chloramphenicol (Cam<sup>R</sup>, 5 μg/ml), <sup>c</sup>Erm<sup>R</sup> (2 μg/ml) and Cam<sup>R</sup> (5 μg/ml), <sup>d</sup>Resistant to neomycin<sup>R</sup> (Neo<sup>R</sup>, 5 μg/ml).

## References

1. Weller GR, Kysela B, Roy R, Tonkin LM, Scanlan E, *et al.* (2002) Identification of a DNA nonhomologous end-joining complex in bacteria. *Science* **297**(5587):1686-1689.
2. Gunka K, Tholen S, Gerwig J, Herzberg C, Stulke J, *et al.* (2012) A high-frequency mutation in *Bacillus subtilis*: requirements for the decyptification of the *gudB* glutamate dehydrogenase gene. *J Bacteriol* **194**(5):1036-1044.

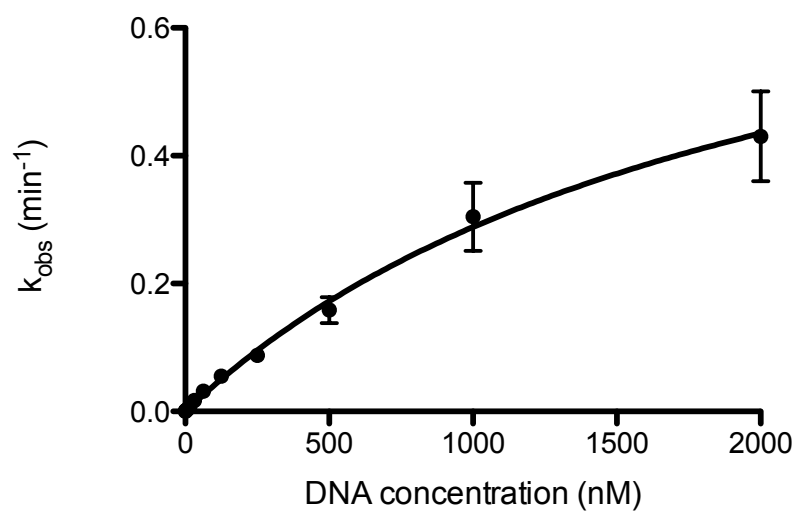

**Supplementary Figure S1.** Steady-state kinetic analysis of the 5'-dRP lyase activity of *BsuLigD*. The release of dRP from a 3' labeled 5'-dRP-containing DNA substrate was examined as a function of the indicated substrate concentration as described in Materials and Methods. Reactions contained 50 nM *BsuLigD* and were incubated at 30 °C for 20 min. Apparent activities were fitted to the Michaelis equation by least-squares nonlinear regression. The values plotted are the mean of three independent experiments.

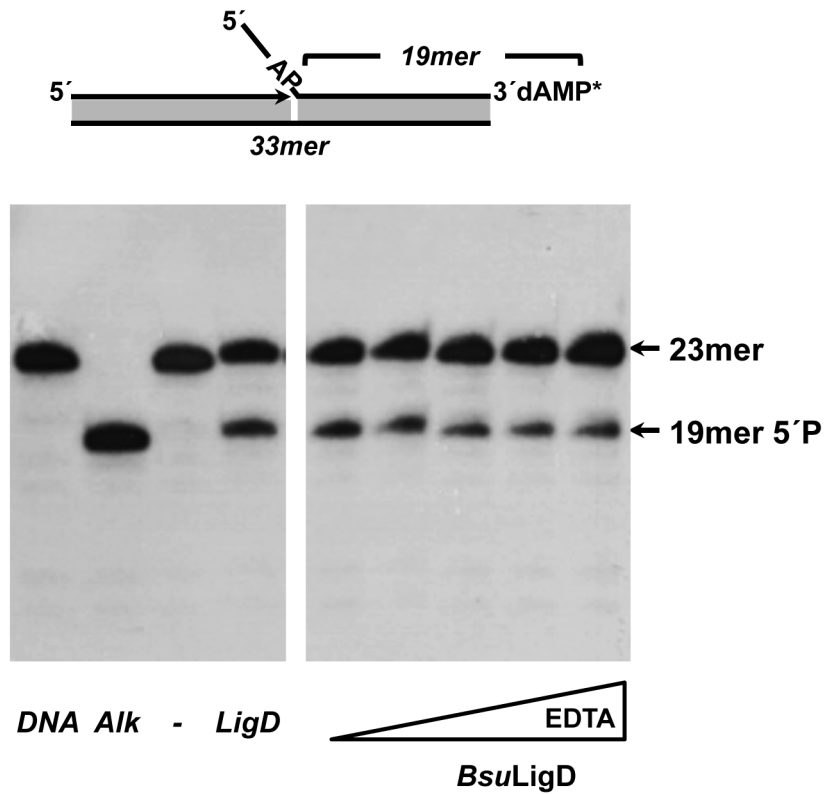

**Supplementary Figure S2.** *BsuLigD* AP-lyase activity in the presence of EDTA. 0.83 nM of the [<sup>32</sup>P]3'-labeled uracil-containing hybrid E depicted on top of the figure was treated with *E. coli* UDG, leaving an intact AP site (*DNA*). 57 nM *BsuLigD* was preincubated with increasing concentrations of EDTA (0, 12.5, 25, 50 and 100 mM). After overnight incubation at 4°C, both the EDTA-treated *BsuLigD* and 57 nM of fresh protein were incubated with the DNA substrate during 30 min or 30°C, as described in Materials and Methods. After incubation samples were analyzed by 8 M urea-20% PAGE and autoradiography. Position of products is indicated. *Alk*, alkaline hydrolysis of the AP site.

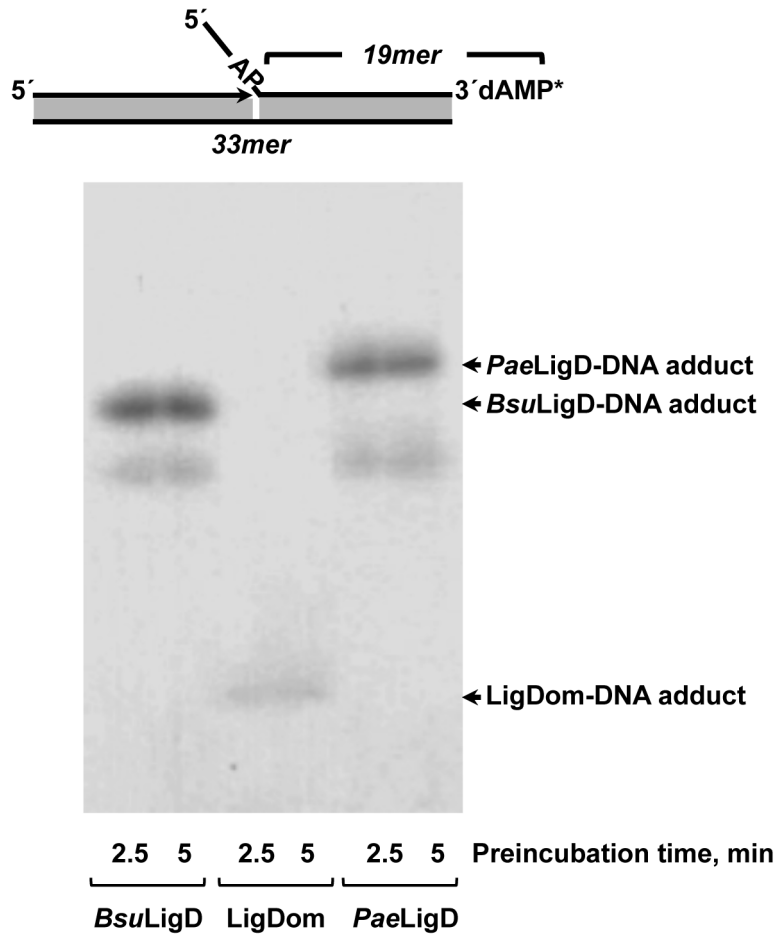

**Supplementary Figure S3.** Formation of protein-DNA adducts. The assay was performed as described in Materials and Methods by incubating 4 nM of the [<sup>32</sup>P]3'-labeled uracil-containing oligonucleotide (depicted on top of the figure) pretreated with *E. coli* UDG to leave an intact AP site and further incubated with the indicated protein (100 nM *BsuLigD* or *PaeLigD*, 147 nM *LigDom*) for the indicated times in the presence of 0.64 mM MnCl<sub>2</sub>. After incubation samples were reduced by adding 100 mM NaBH<sub>4</sub> and further subjected to SDS-PAGE and autoradiography. The mobility of the different protein-DNA adducts is indicated.

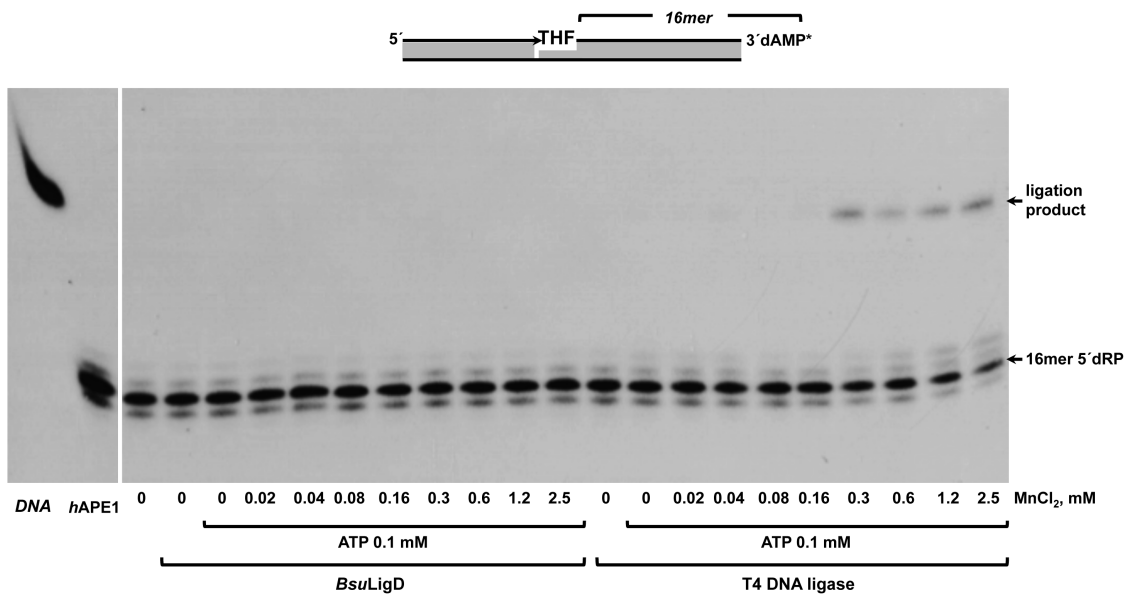

**Supplementary Figure S4.** *BsuLigD* does not seal 3'-OH and 5'-dRP ends. A 3'-end labeled (\*) oligonucleotide containing a single synthetic AP (THF) site (lane *DNA*) was treated with *hAPE1* to insert a nick at the 5' side of the molecule (lane *hAPE1*). The assay was performed as described in Materials and Methods. Briefly, 0.53 nM of the nicked substrate was incubated with either 57 nM *BsuLigD* or 40 U of T4 DNA ligase with the indicated MnCl<sub>2</sub> concentrations and in the absence or presence of 0.1 mM ATP. After incubation for 30 min at 30°C, samples were analyzed by 8 M urea-20% PAGE and autoradiography. Position of products is indicated.

## A Ligation activity

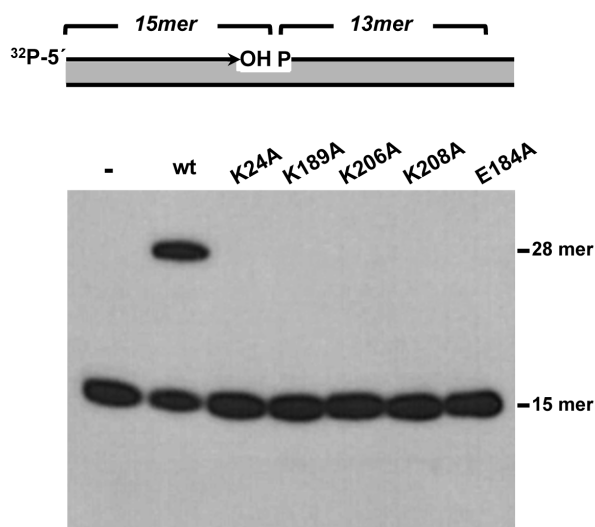

## B 5'dRP lyase activity

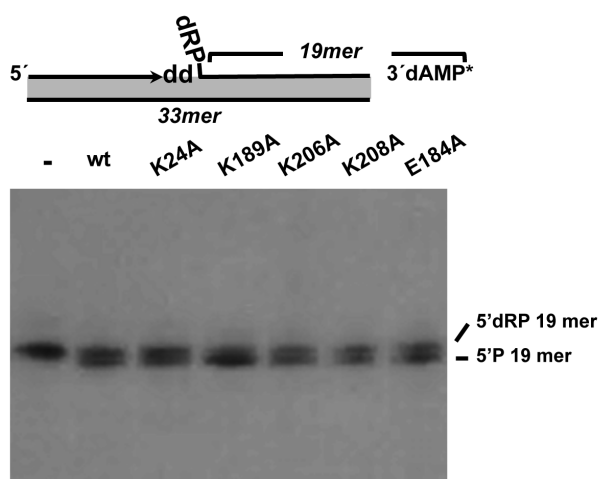

**Supplementary Figure S5.** Analysis of dRP lyase and ligase activity of *BsuLigD* mutants K24A, K189A, K206A, K208A and E184A. (A) Ligase activity. The assay was performed by incubating 23 nM of the indicated protein with 1.2 nM of the nicked DNA hybrid F (depicted in top of the panel) in the presence of 5  $\mu\text{M}$   $\text{MnCl}_2$ . After incubation for 30 min at 30°C, samples were analyzed by 8 M urea-20% PAGE and autoradiography. (B) dRP lyase activity. The assay was performed as described in Materials and Methods. Briefly, 50 nM of the DNA hybrid B was preincubated with *E. coli* UDG as described above, to render a 5'-dRP end (see scheme of the substrate on top of the panel). Reactions were initiated by adding 28 nM of the indicated protein in the presence of 0.64 mM  $\text{MnCl}_2$ . After incubation for 20 min at 30 °C, reactions were stopped by addition of freshly prepared  $\text{NaBH}_4$ . Samples were analyzed by 8 M urea-20% PAGE and autoradiography.

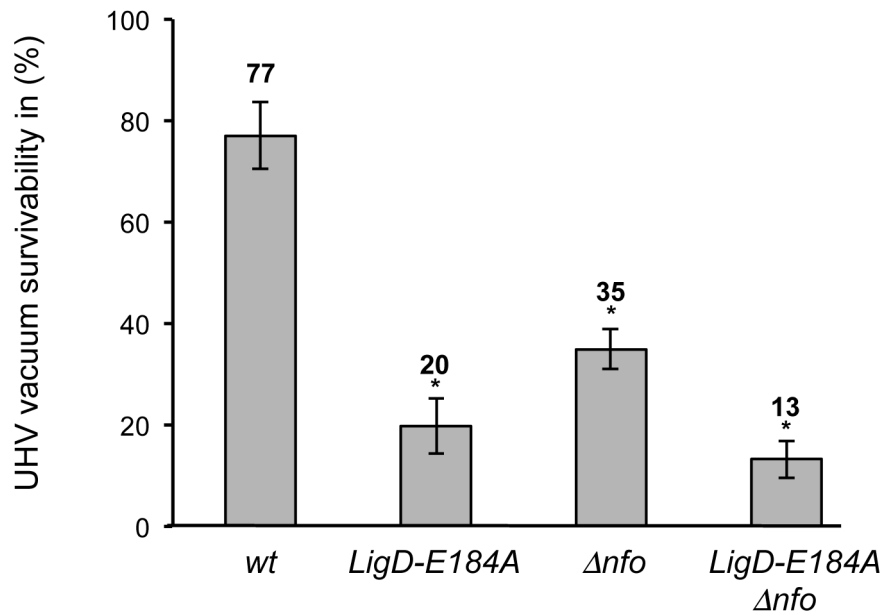

**Supplementary Figure S6.** Survival of *B. subtilis* spores expressing the *BsuLigD* ligase deficient mutant E184A and/or Nfo AP endonuclease. The assay was performed as described in Materials and Methods. The CFUs of UHV-treated spores were divided with the average CFU-value of untreated spore samples in order to obtain the survival after UHV. The data presented are expressed as average values $\pm$ SD,  $N=4$ . Asterisks indicate UHV survival values that were significantly different ( $P$ -values  $\leq 0.05$ ) from values for wild-type (*wt*) spores.
